# Supplementary material for: Effects of Ingesting Fucoidan Derived from Cladosiphon okamuranus Tokida on Human NK Cells: A Randomized, Double-Blind, Parallel-Group, Placebo-Controlled Pilot Study
Source: MDPI journal article supplement (doi:10.3390/md19060340), 2021-06-15
Supplement: s1 [file s1]

## Supplementary Materials

Effects of ingesting fucoidan derived from *Cladosiphon okamuranus* Tokida on human NK cells: a randomized, double-blind, parallel-group, placebo-controlled pilot study.

Makoto Tomori, Takeaki Nagamine, Tomofumi Miyamoto, and Masahiko Iha

## NK cell activity

Table S1. NK cell activity in fucoidan group

| No | Gender | Age | 0W   | 4W   | 8W   | 12W  | 16W  |
|----|--------|-----|------|------|------|------|------|
| 1  | female | 48  | 36.8 | 53.7 | 70.9 | 56.5 | 54.7 |
| 2  | female | 60  | 80.9 | 74.4 | 68.4 | 75.5 | 67.2 |
| 3  | male   | 49  | 72.3 | 89.9 | 85.9 | 89.4 | 79.4 |
| 4  | female | 44  | 36.0 | 31.9 | 39.6 | 34.6 | 35.4 |
| 5  | male   | 45  | 57.9 | 59.1 | 61.5 | 64.8 | 35.3 |
| 6  | male   | 34  | 73.3 | 86.5 | 83.9 | 83.6 | 74.7 |
| 7  | male   | 49  | 25.8 | 63.4 | 64.8 | 71.3 | 52.0 |
| 8  | male   | 37  | 77.3 | 85.2 | 78.7 | 87.2 | 75.1 |
| 9  | female | 43  | 60.7 | 65.4 | 69.6 | 67.3 | 46.0 |
| 10 | male   | 42  | 68.9 | 65.9 |      |      |      |
| 11 | male   | 59  | 86.0 | 88.7 | 83.8 | 86.2 | 74.9 |
| 12 | male   | 32  | 30.6 | 44.1 | 58.9 | 42.0 | 36.4 |
| 13 | female | 55  | 82.0 | 86.9 | 80.1 | 89.8 | 79.9 |
| 14 | female | 41  | 64.5 | 65.1 | 63.4 | 59.2 | 42.3 |
| 15 | female | 54  | 64.1 | 68.7 | 64.8 | 67.2 | 58.3 |
| 16 | male   | 46  | 45.2 | 57.2 | 52.7 | 42.6 | 49.2 |
| 17 | female | 41  | 31.1 | 38.8 | 39.8 | 40.5 | 44.9 |
| 18 | female | 40  | 49.4 | 38.3 | 62.6 | 61.4 | 56.8 |
| 19 | male   | 52  | 73.9 | 87.9 | 77.9 | 85.3 | 80.0 |
| 20 | female | 39  | 69.8 | 84.1 | 80.9 | 75.1 | 61.8 |

Unit is percentage(%).

Normal range: 1) male: 44.1-75.4%, 2) female: 36.7-63.4%

Table S2. NK cell activity in placebo group

| No | Gender | Age | 0W   | 4W   | 8W   | 12W  | 16W  |
|----|--------|-----|------|------|------|------|------|
| 1  | female | 61  | 50.6 | 59.2 | 67.0 | 80.7 | 69.5 |
| 2  | female | 57  | 30.7 | 47.2 | 38.4 | 48.0 | 45.2 |
| 3  | male   | 49  | 81.5 | 81.6 | 81.2 | 62.4 | 77.2 |
| 4  | female | 37  | 40.2 | 46.9 | 53.0 | 11.3 | 41.7 |
| 5  | male   | 36  | 86.2 | 89.3 | 82.5 | 84.8 | 86.3 |
| 6  | male   | 44  | 54.7 | 75.4 | 58.1 | 76.8 | 69.1 |
| 7  | male   | 49  | 75.1 | 70.7 | 64.2 | 80.3 | 58.4 |
| 8  | female | 46  | 61.7 | 80.4 | 71.9 | 73.9 | 63.7 |
| 9  | male   | 54  | 64.1 | 74.9 | 56.2 | 63.2 | 55.3 |
| 10 | female | 52  | 68.6 | 81.3 | 75.7 | 78.5 | 67.0 |
| 11 | female | 43  | 55.9 | 60.7 | 64.3 | 70.3 | 48.3 |
| 12 | male   | 40  | 58.0 | 50.0 | 50.4 | 59.5 | 53.9 |
| 13 | female | 48  | 67.4 | 63.1 | 61.9 | 64.7 | 57.9 |
| 14 | female | 42  | 50.1 | 53.4 | 41.6 | 32.1 | 51.5 |
| 15 | male   | 46  | 63.8 | 63.5 | 58.6 | 65.6 | 47.8 |
| 16 | female | 39  | 68.1 | 64.0 | 63.7 | 78.9 | 50.5 |
| 17 | male   | 62  | 67.6 | 69.8 | 59.6 | 68.7 | 61.5 |
| 18 | male   | 45  | 53.6 | 63.2 | 42.0 | 64.2 | 55.1 |
| 19 | female | 38  | 57.5 | 57.8 | 55.2 | 58.9 | 56.2 |
| 20 | male   | 51  | 75.1 | 76.9 | 73.6 | 83.5 | 75.5 |

Unit is percentage(%).

Normal range: 1) male: 44.1-75.4%, 2) female: 36.7-63.4%

IFN- $\gamma$

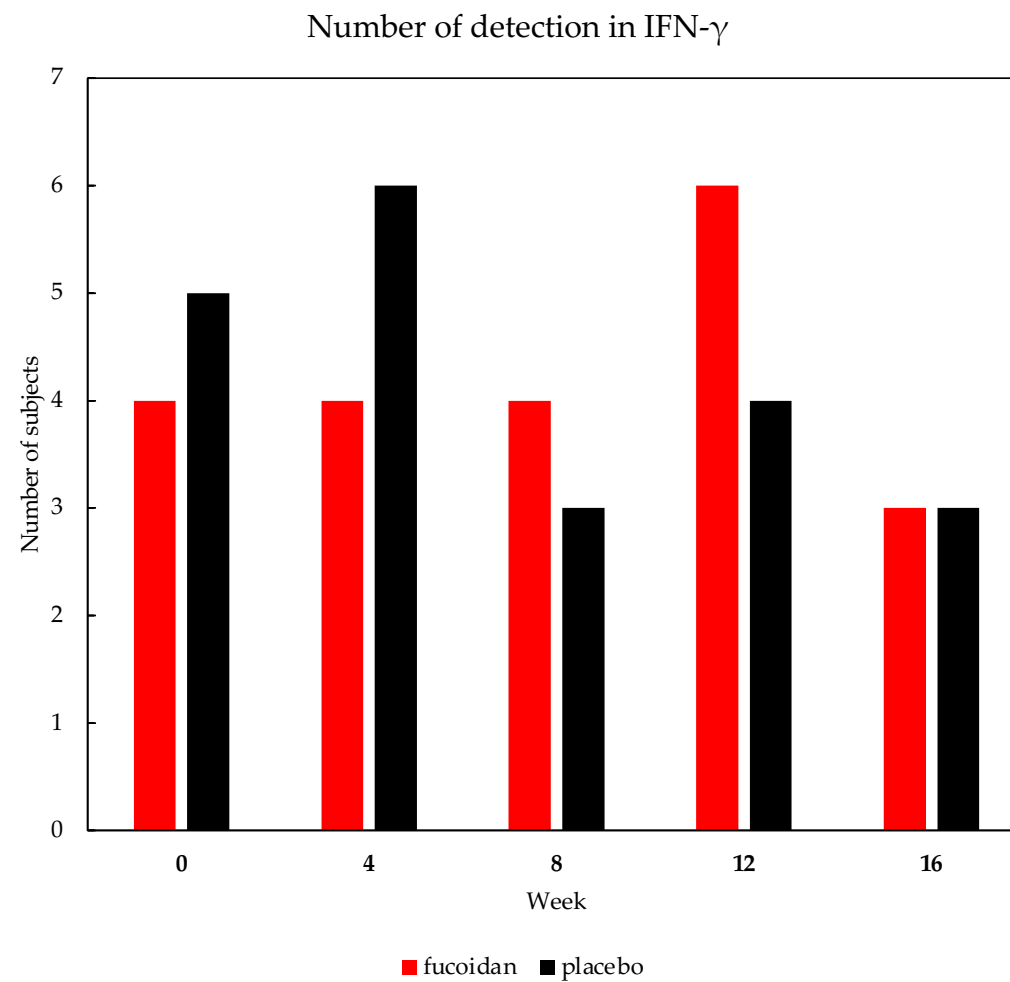

Figure S1. between-group comparison of subjects in which IFN- $\gamma$  concentrations were detected in the blood. Detection limit: >1.56 pg/mL.

Blood test

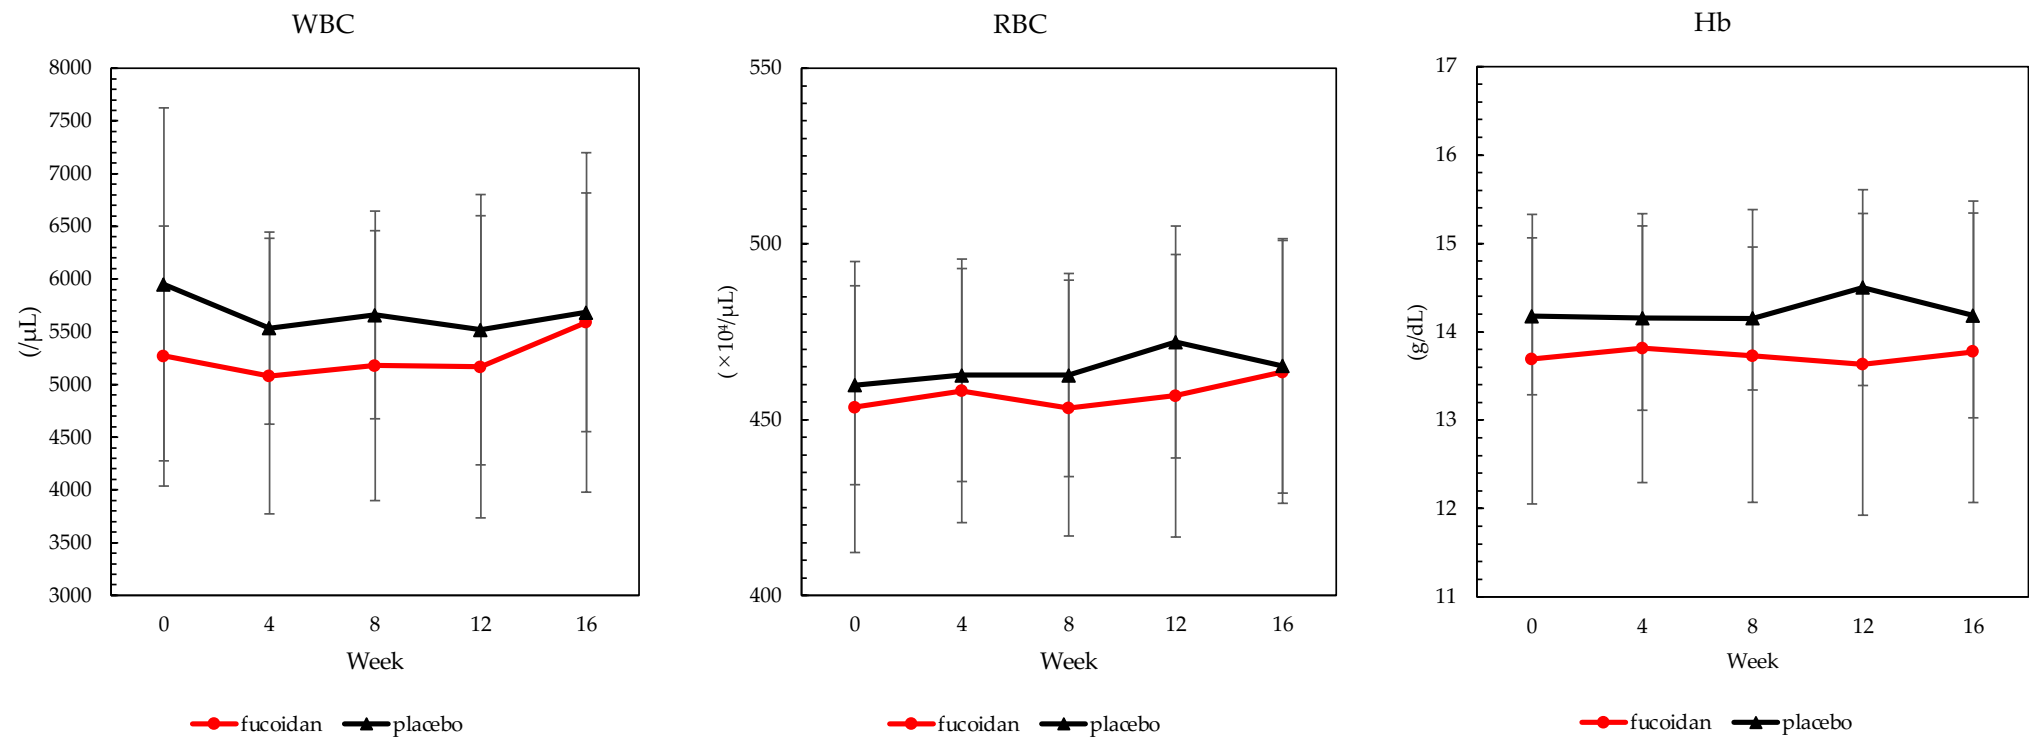

Figure S2. Blood test result. all data was presented as mean  $\pm$  standard deviation. WBC, RBC and Hb were no significant different.

Blood test

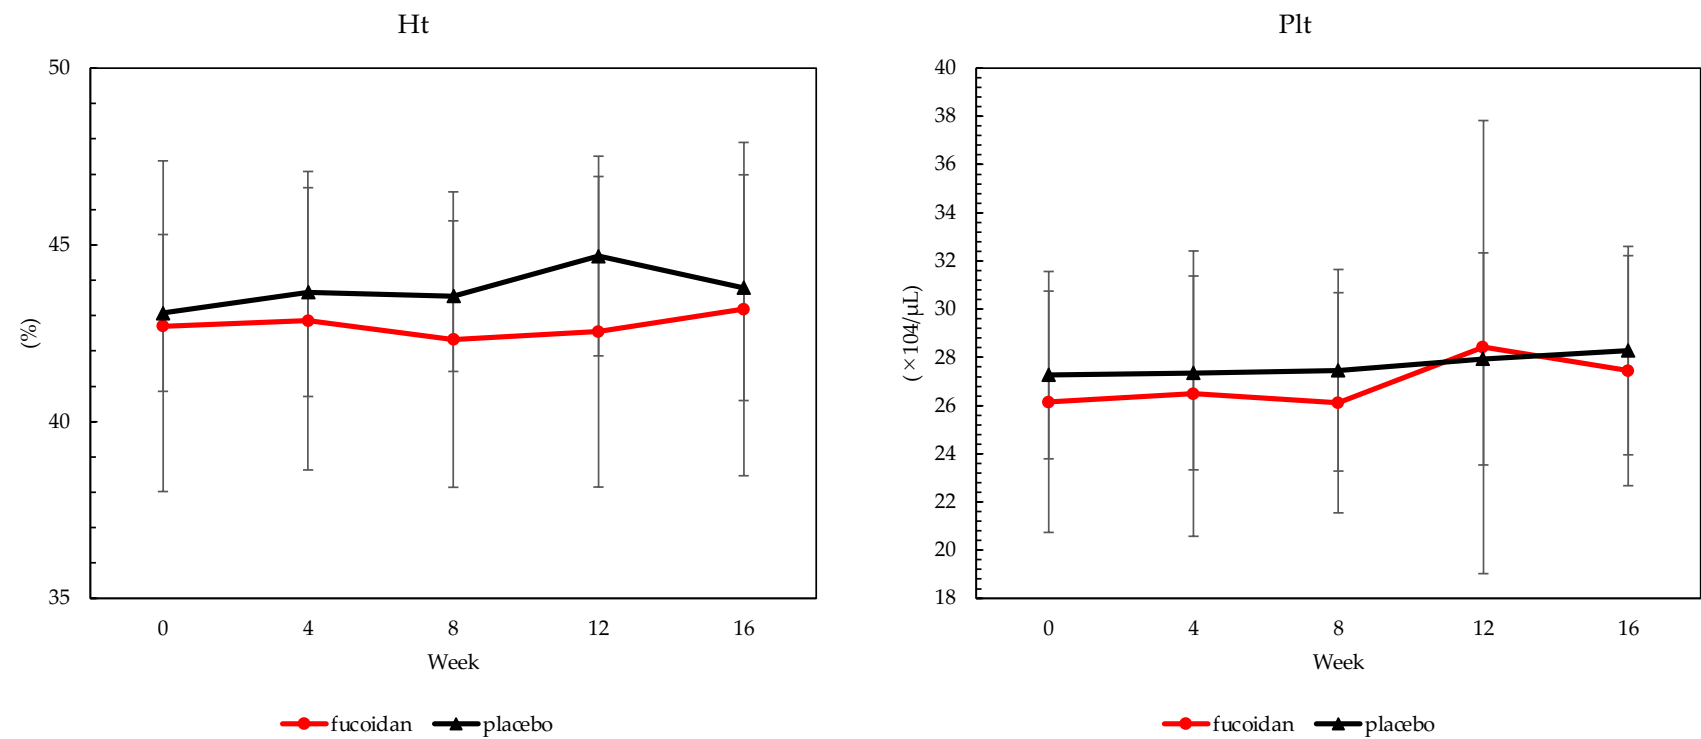

Figure S3. Blood test result. all data was presented as mean  $\pm$  standard deviation. Ht and Plt were no significant different.

## Biochemical test

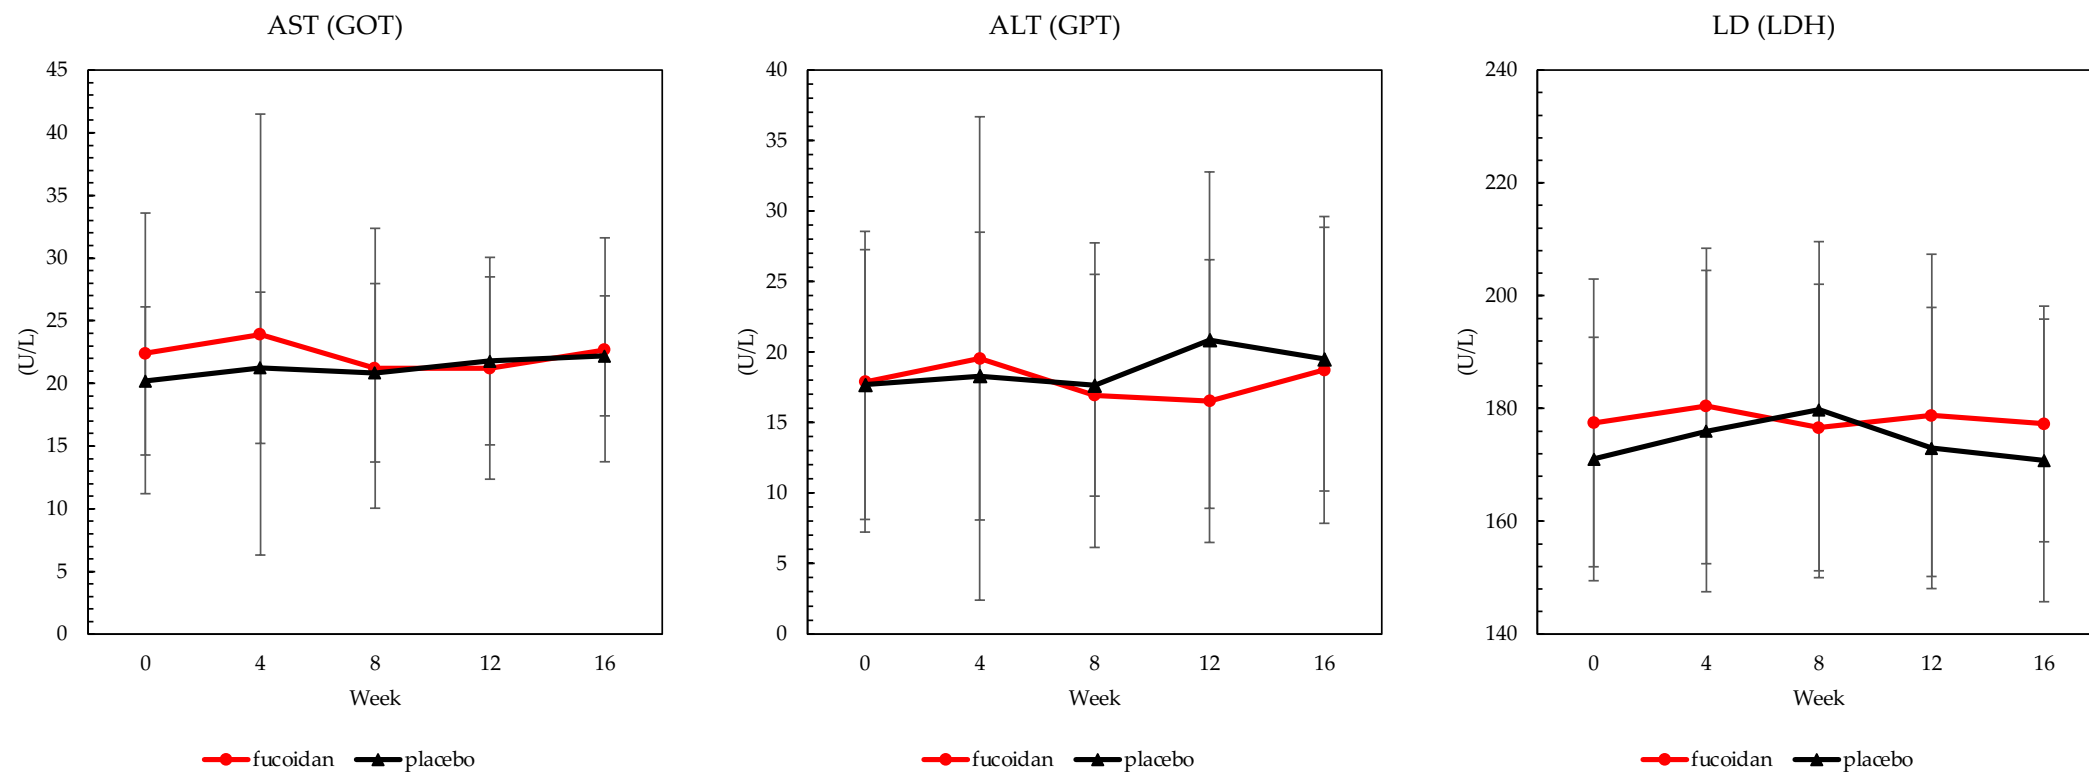

Figure S4. Biochemical test result. all data was presented as mean  $\pm$  standard deviation. AST, ALT and LF were no significant different.

## Biochemical test

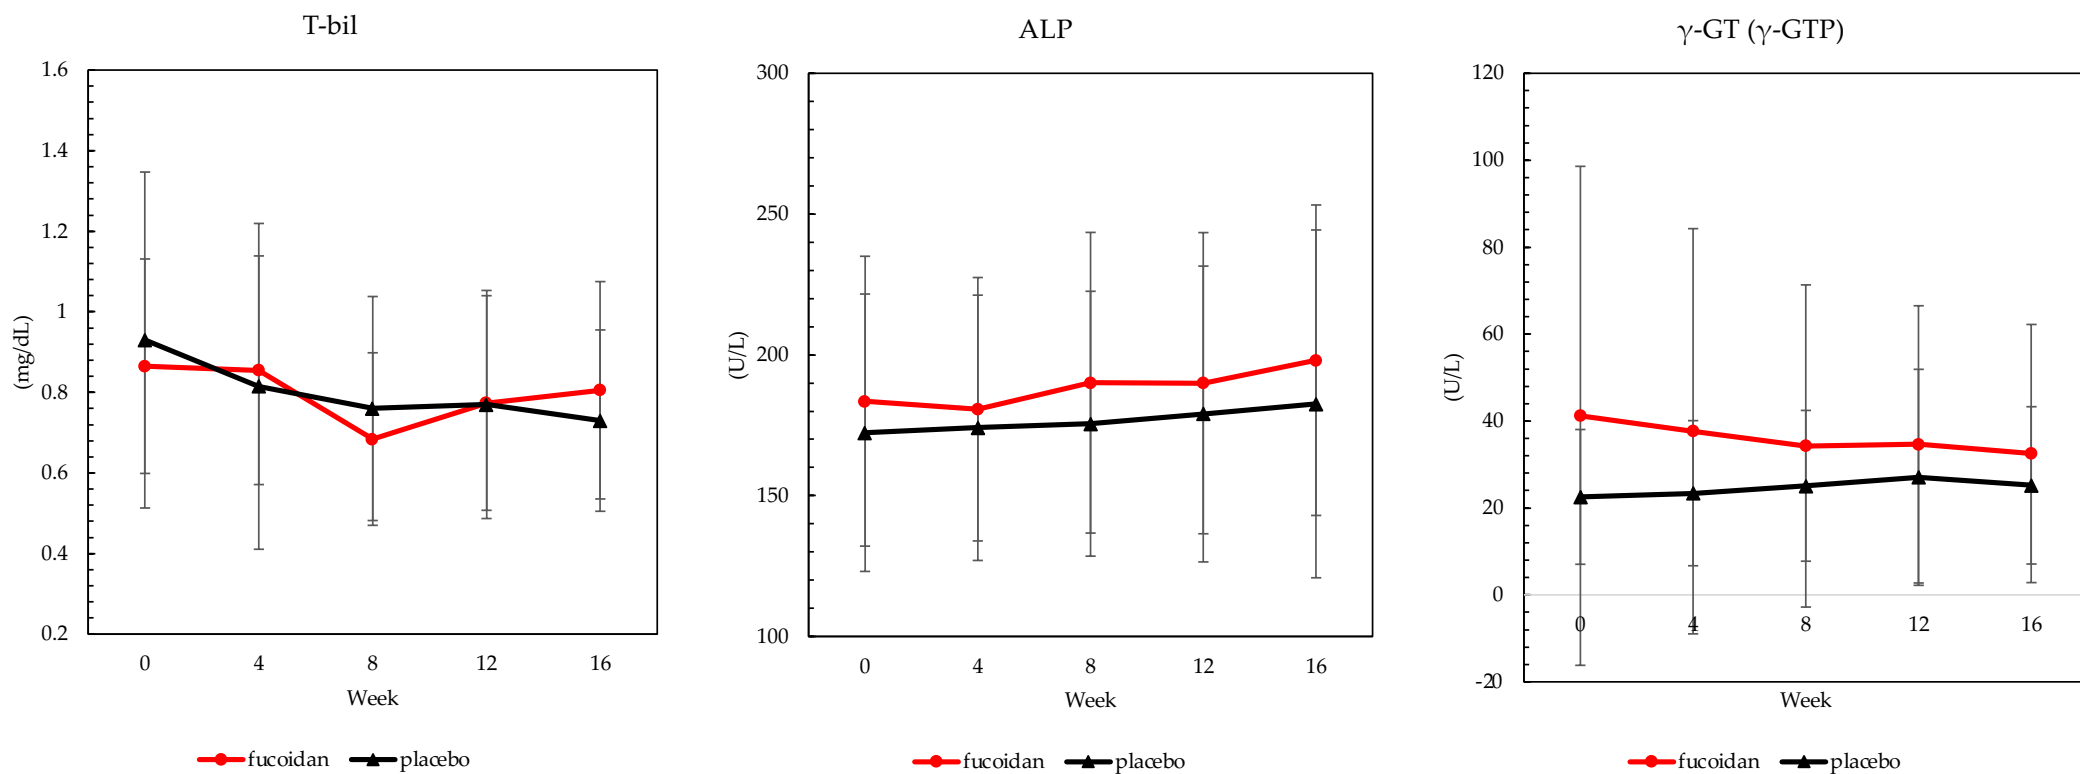

Figure S5. Biochemical test result. all data was presented as mean  $\pm$  standard deviation. T-bil, ALP and  $\gamma$ -GT were no significant different.

Biochemical test

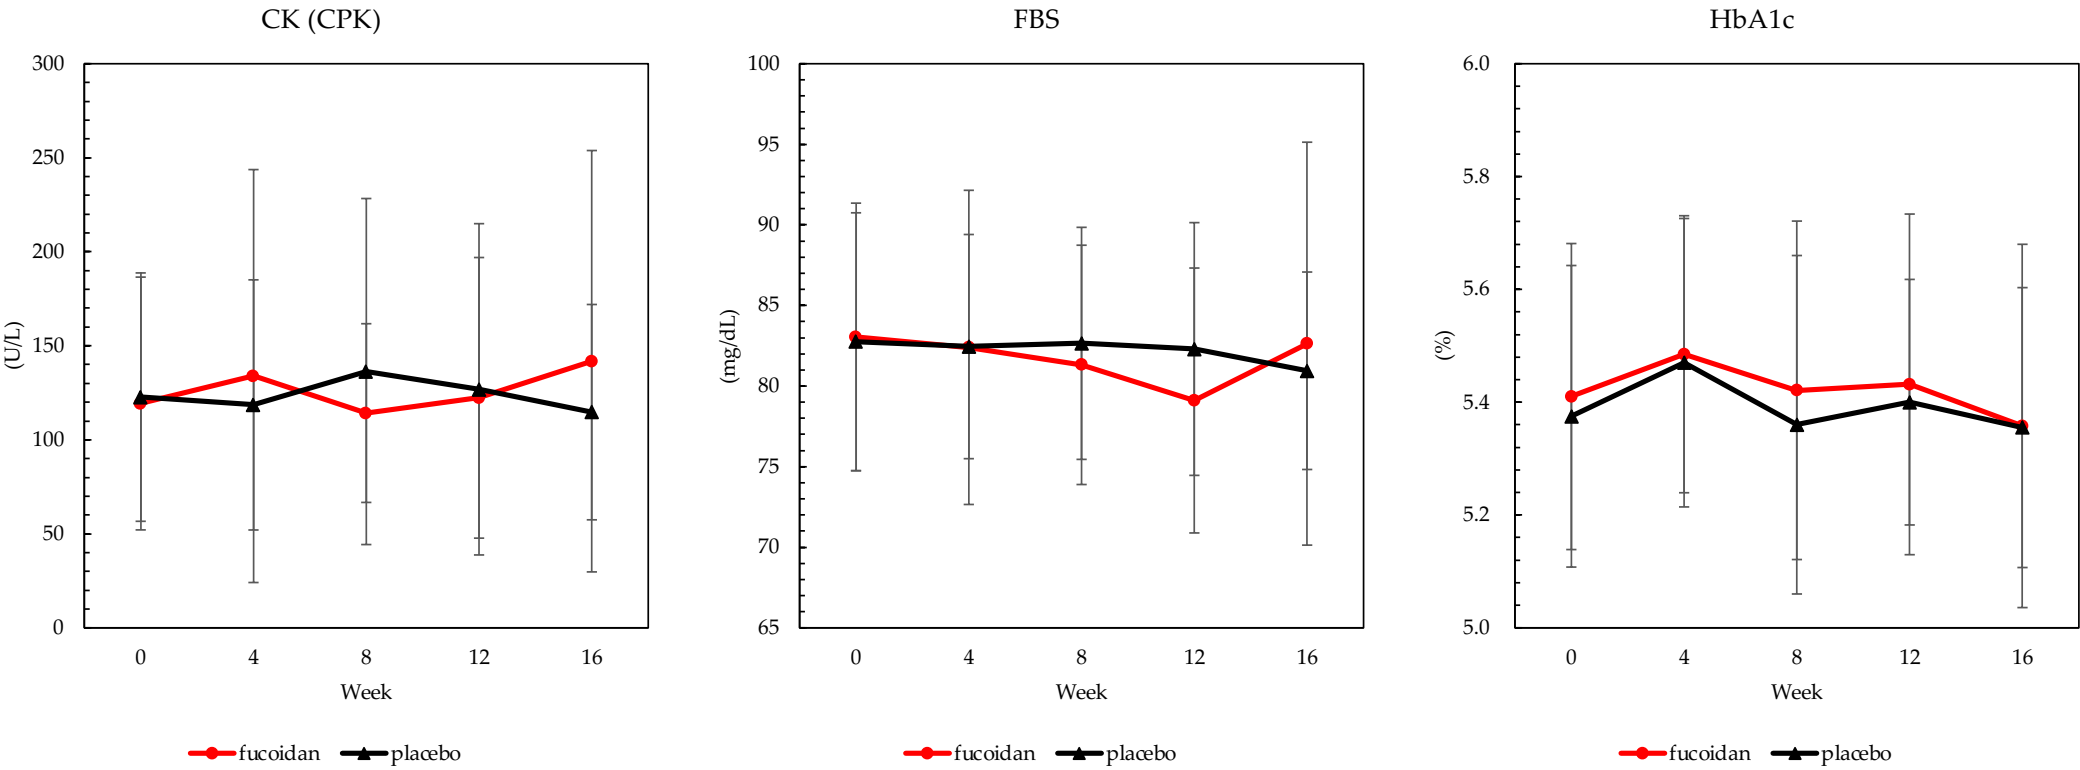

Figure S6. Biochemical test result. all data was presented as mean  $\pm$  standard deviation. CK, FBS and HbA1c were no significant different.

Biochemical test

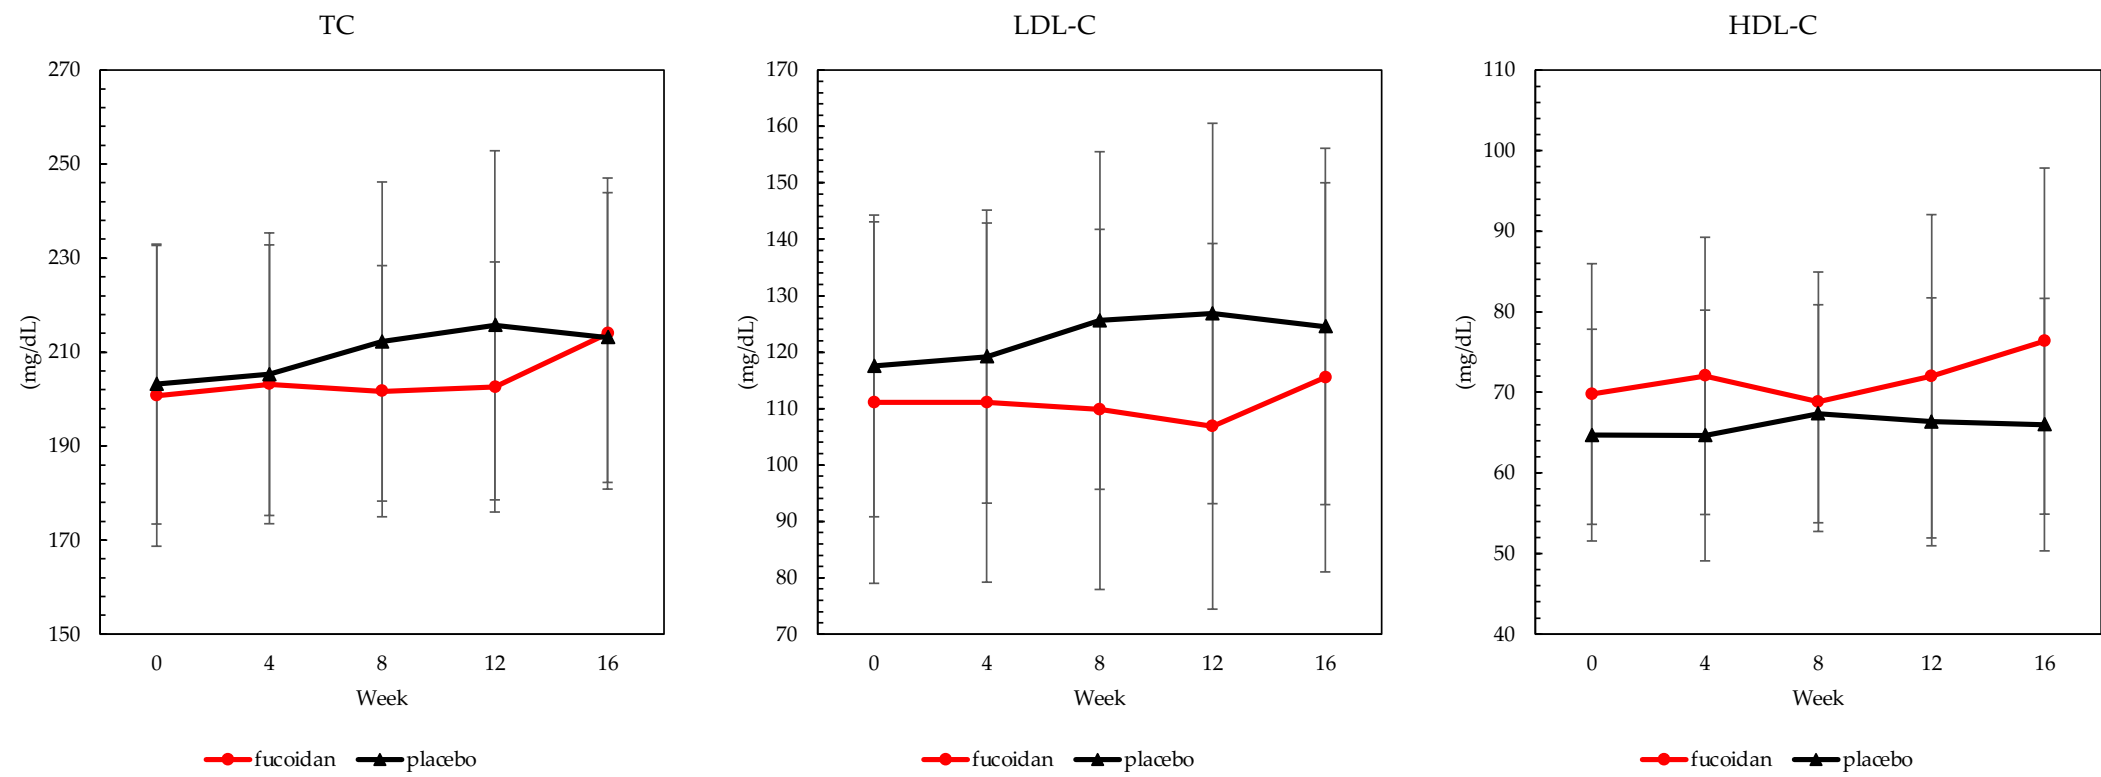

Figure S7. Biochemical test result. all data was presented as mean  $\pm$  standard deviation. TC, LDL-C and HDL-C were no significant different.

## Biochemical test

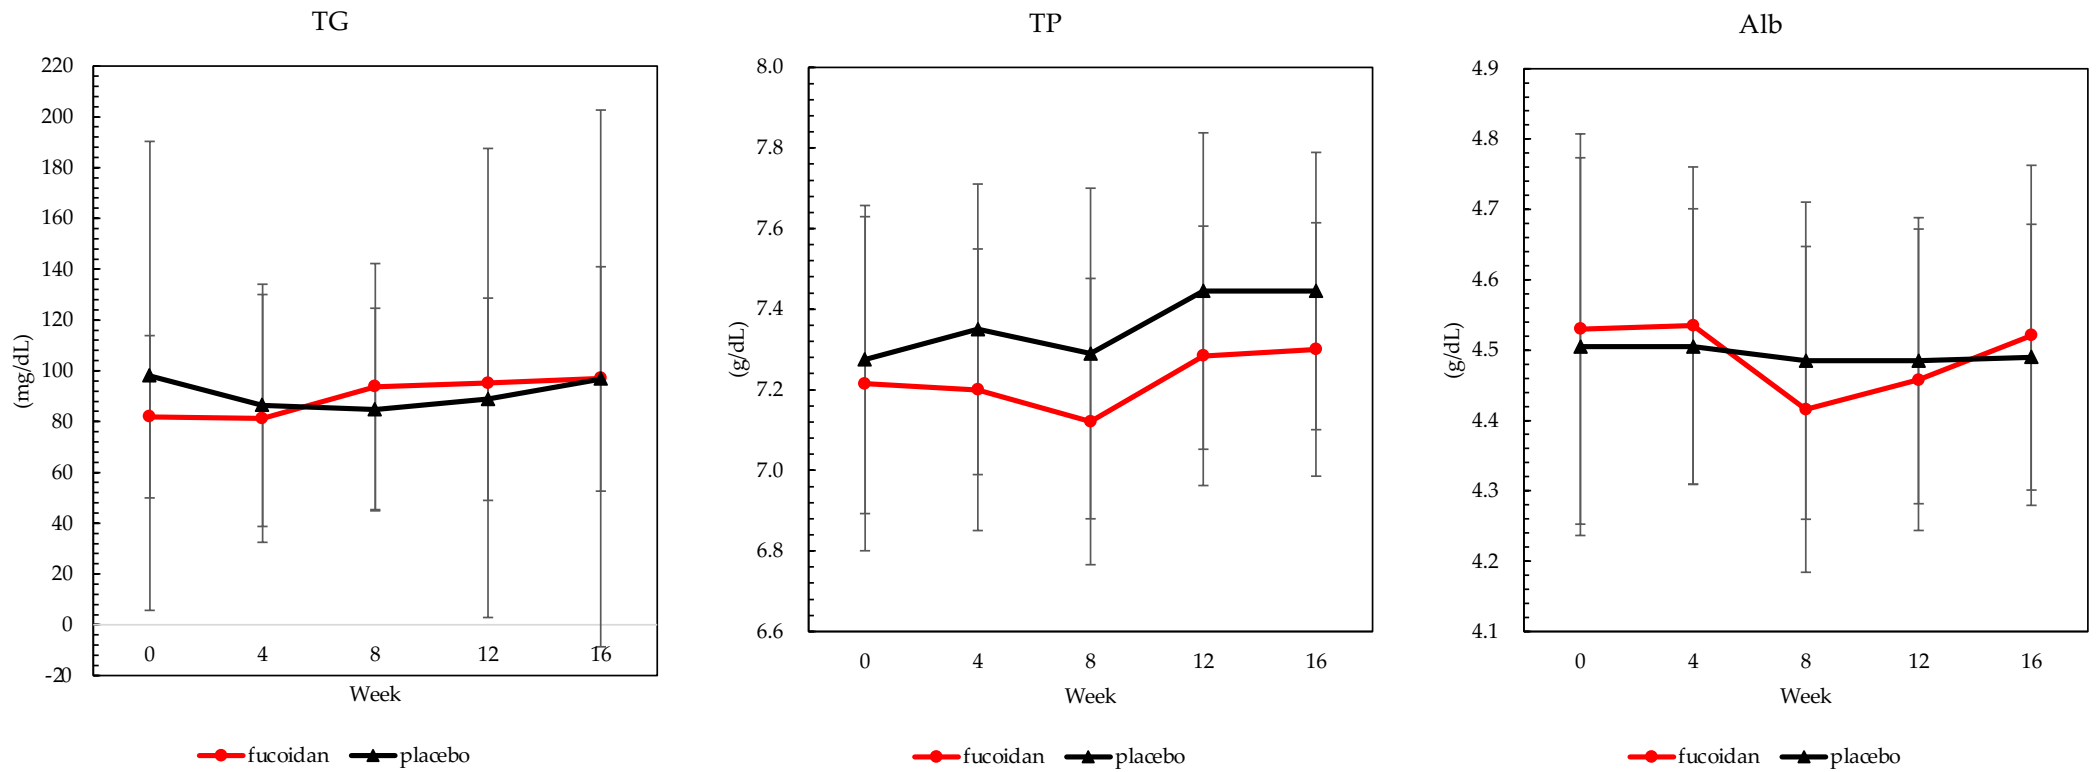

Figure S8. Biochemical test result. all data was presented as mean  $\pm$  standard deviation. TG, TP and Alb were no significant different.

Biochemical test

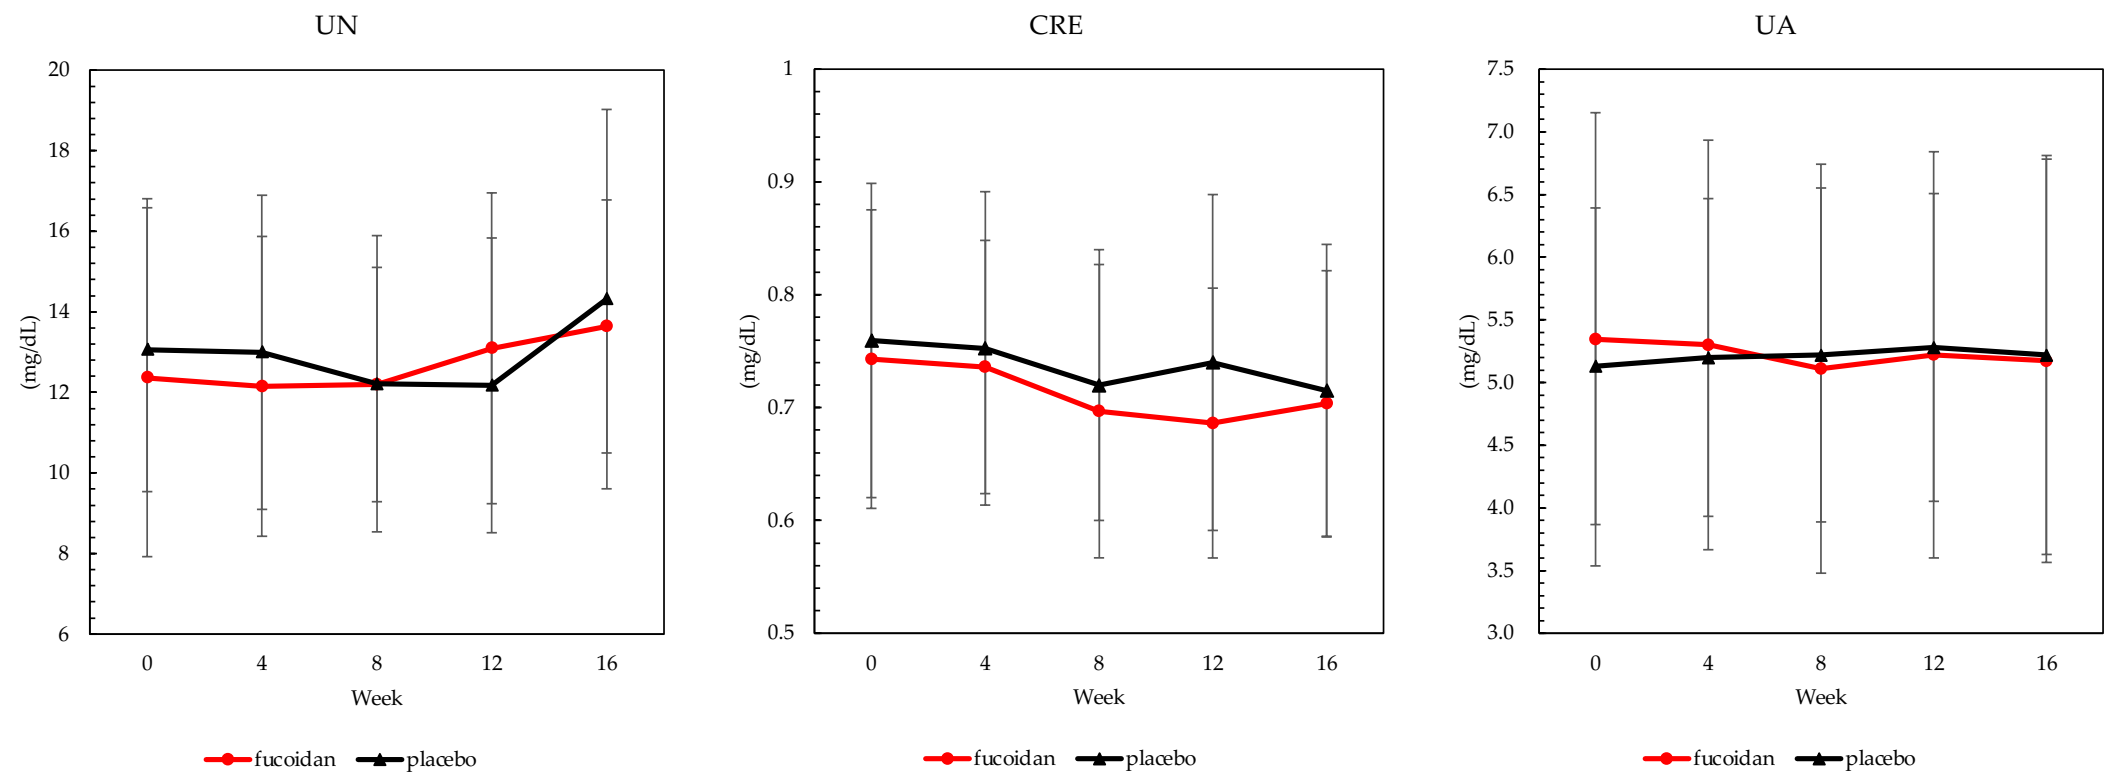

Figure S9. Biochemical test result. all data was presented as mean  $\pm$  standard deviation. UN, CRE and UA were no significant different.

## Biochemical test

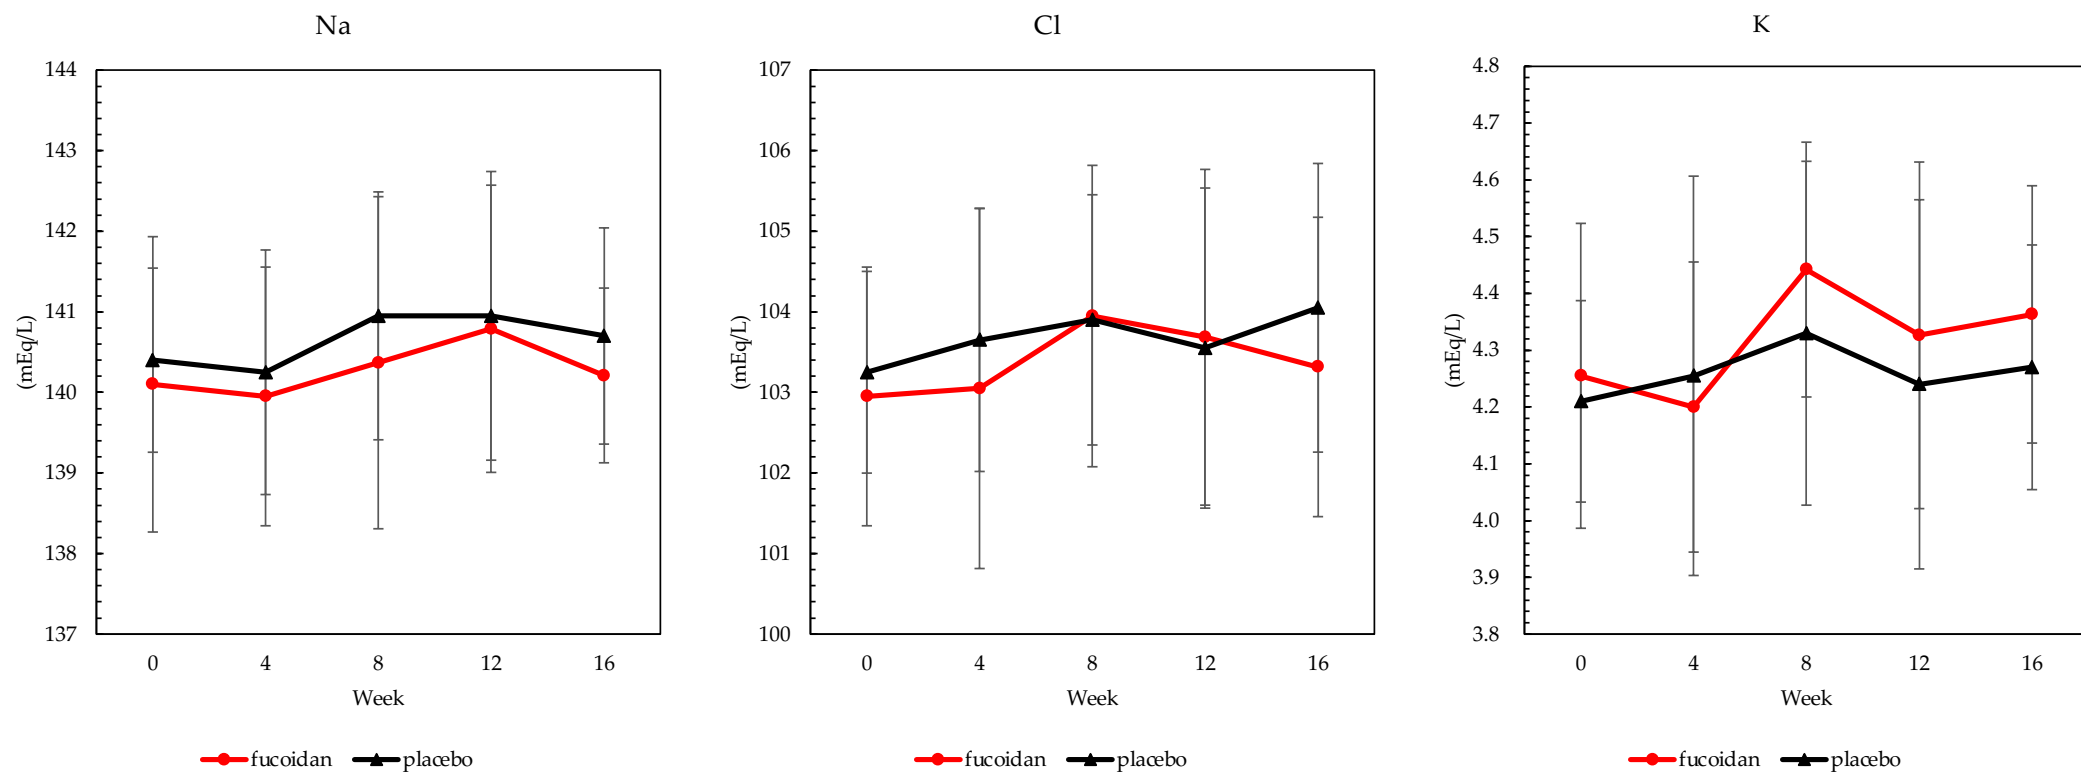

Figure S10. Biochemical test result. all data was presented as mean  $\pm$  standard deviation. Na, Cl and K were no significant different.

## Biochemical test

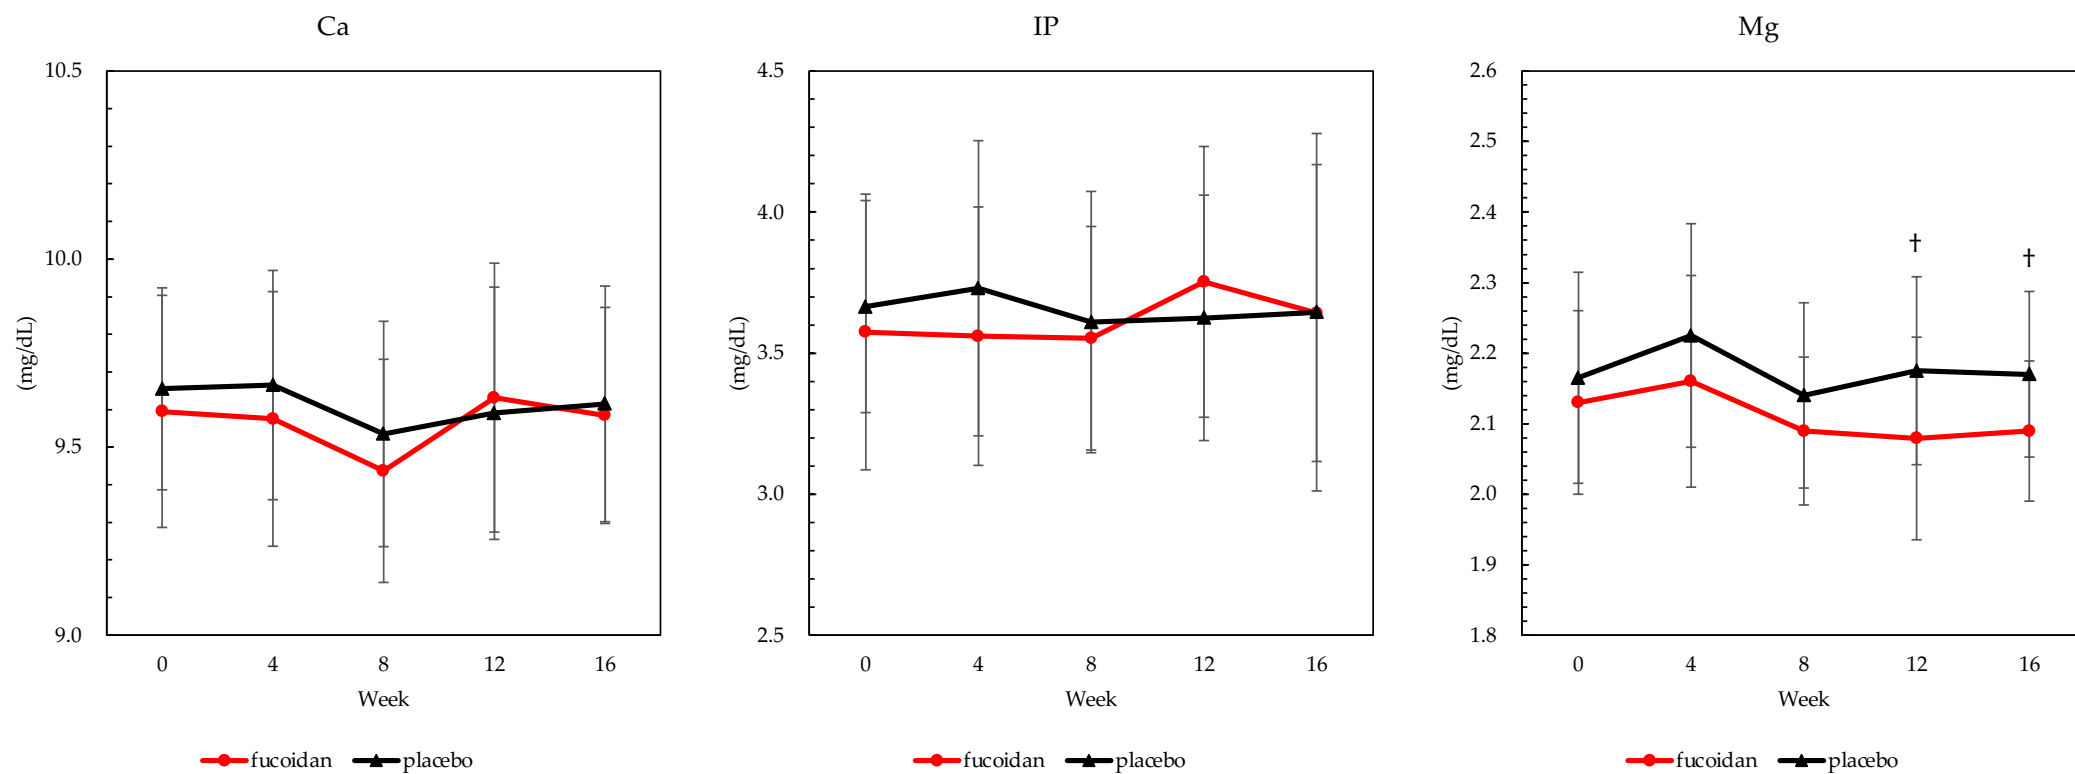

Figure S11. Biochemical test result. all data was presented as mean  $\pm$  standard deviation.

Ca and IP were no significant different.

<sup>†</sup>There was a significant difference between the 12 w and 16 w of the fucoidan and placebo group. ( $p < 0.05$ , t-test).

## Biochemical test

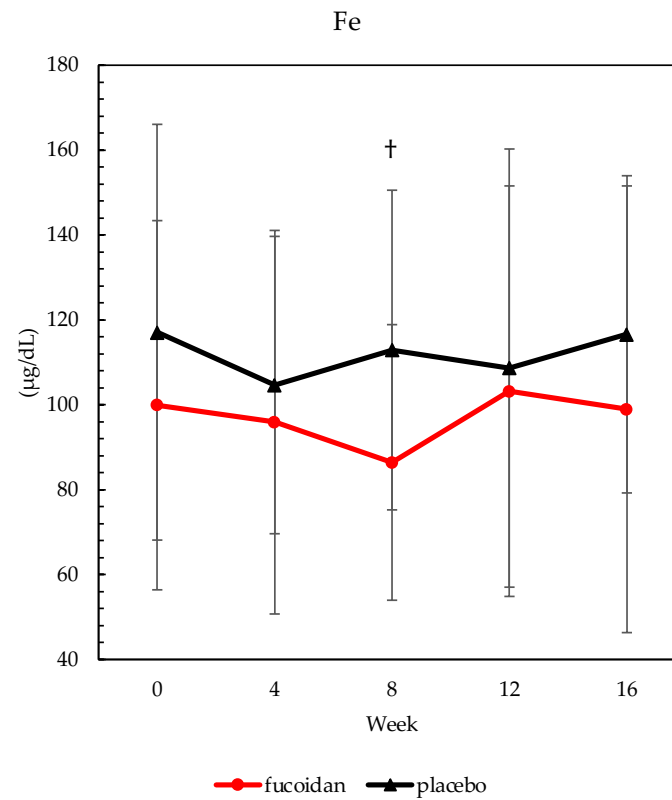

Figure S12. Biochemical test result. all data was presented as mean  $\pm$  standard deviation.

<sup>†</sup>There was a significant difference between the 8 w of the fucoidan and placebo group. ( $p < 0.05$ , t-test).
